# Supplementary material for: Mitochondrial Genome-Knockout Cells Demonstrate a Dual Mechanism of Action for the Electron Transport Complex I Inhibitor Mycothiazole
Source: PubMed Central journal article supplement (PMC3366682; doi:10.3390/md10040900), 2012-04-16

## Supplementary Data

# Mitochondrial Genome-Knockout Cells Demonstrate a Dual Mechanism of Action for the Electron Transport Complex I Inhibitor Mycothiazole

Kirsten J. Meyer, A. Jonathan Singh, An S. Tan, Alanna Cameron, Dora C. Leahy, David O'Sullivan, Praneta Joshi, Anne C. La Flamme, Peter T. Northcote, Michael V. Berridge and John H. Miller

**Figure S1.** Mycothiazole  $^1\text{H}$  (A) and  $^{13}\text{C}$  (B) NMR spectra. NMR spectra ( $\text{CDCl}_3$ , 600 MHz) were obtained using a Varian DirectDrive spectrometer equipped with a triple resonance HCN cryogenic probe. Peaks at dH 5.30 and dC 53.8 are residual dichloromethane. Peaks at dH 1.25 and dC 29.8 are fatty acid residue in the preparation.

A.  $^1\text{H}$  NMR

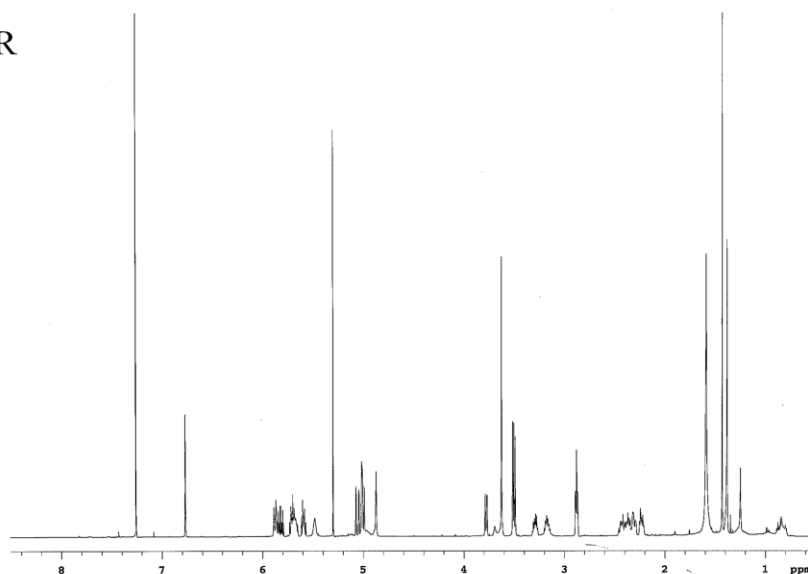

B.  $^{13}\text{C}$  NMR

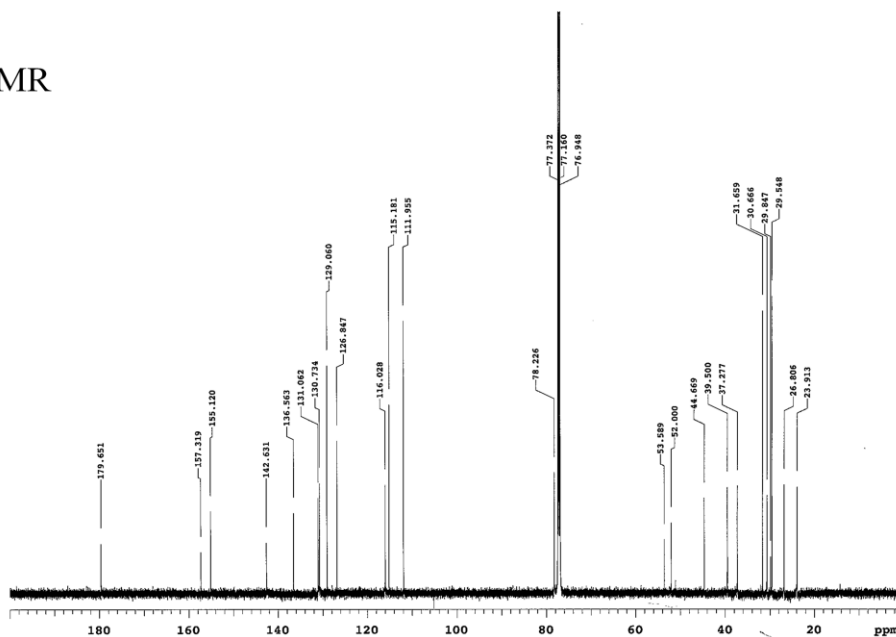

**Figure S2.** Percentage of HL-60 cells in different phases of the cell cycle after treatment for 16 h with MYZ at concentrations ranging from 0.1 to 50  $\mu$ M (n = 3 preparations; values are mean  $\pm$  SEM).

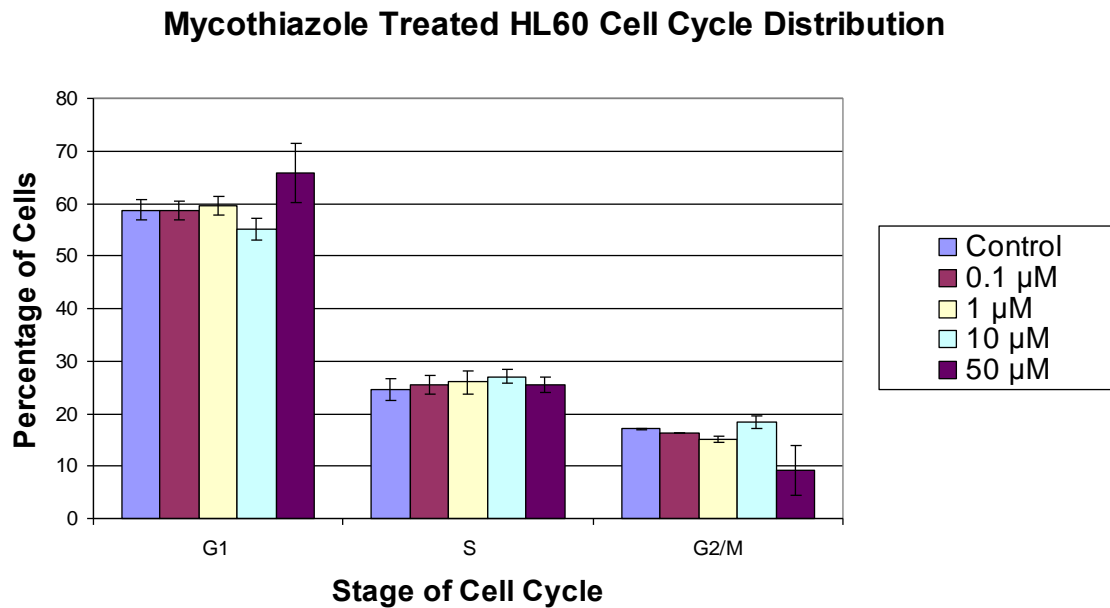

**Table S1.** Geometric means of the DCF fluorescence values for data of Figure 7.

| Cell Line     | Time (h) | 0 nM | 0.5 nM | 1 nM | 5 nM | 10 nM | 100 nM | 2 nM       |
|---------------|----------|------|--------|------|------|-------|--------|------------|
|               |          | MYZ  | MYZ    | MYZ  | MYZ  | MYZ   | MYZ    | Paclitaxel |
| HeLa          | 24       | 1405 | 290    | 548  | 633  | 372   | 379    | 904        |
| HeLa          | 48       | 203  | 224    | 252  | 343  | 293   | 262    | 469        |
| P815          | 24       | 381  |        | 282  |      | 176   | 237    |            |
| P815          | 48       | 508  |        | 598  |      | 516   | 491    |            |
| HeLa $\rho^0$ | 48       | 1279 | 973    | 1393 | 646  | 849   | 1702   | 933        |
| P815 $\rho^0$ | 24       | 553  | 614    | 630  | 583  | 552   | 517    | 407        |

**Figure S3.** Effect of rotenone and MYZ on proliferation of HL-60 and HL-60r<sup>0</sup> cells. Representative graphs of 48 h MTT assays for rotenone and MYZ are presented (n = 2 independent experiments). The average IC<sub>50</sub> values from the two experiments are presented on each graph.

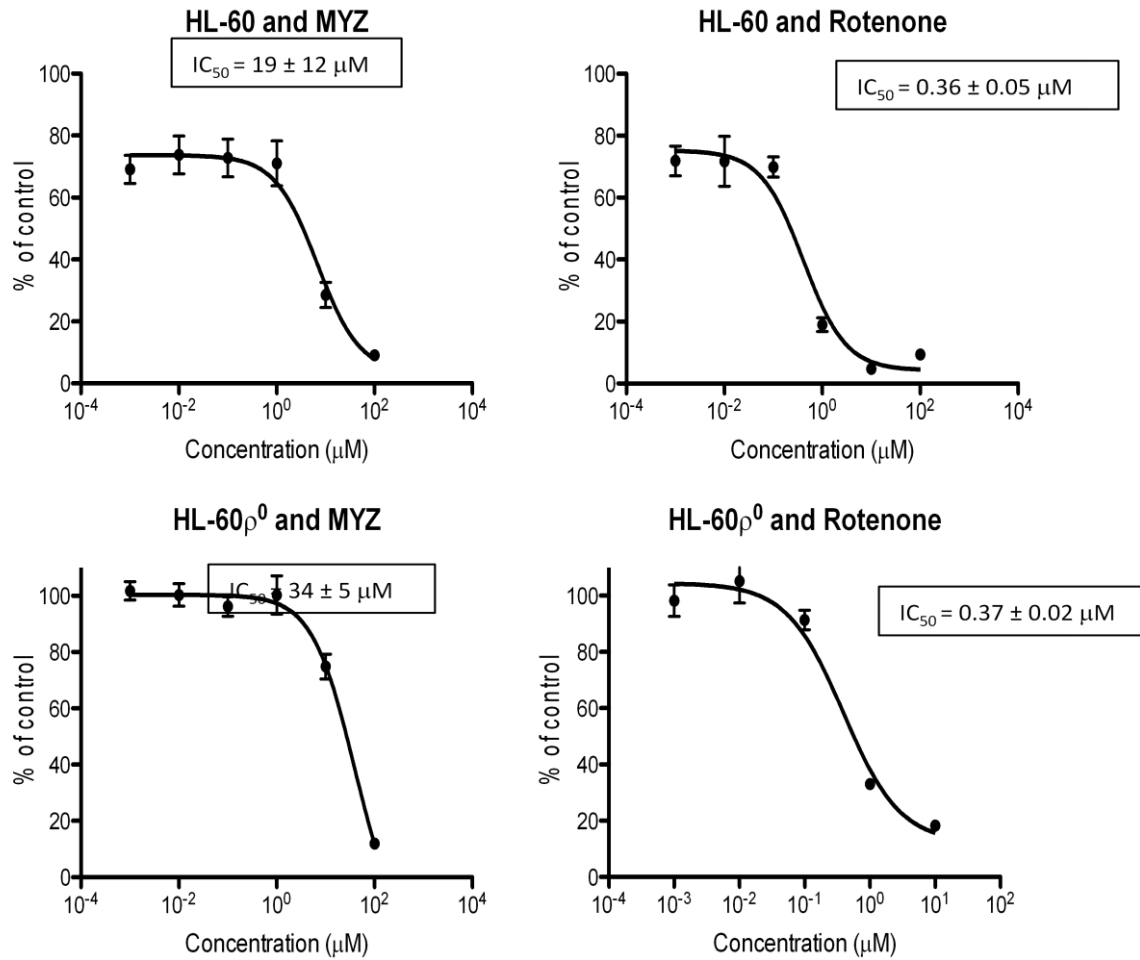

Supplement: marinedrugs-10-00900-s001.pdf [file marinedrugs-10-00900-s001.pdf]
